# Supplementary material for: Augmented anticancer effect and antibacterial activity of silver nanoparticles synthesized by using Taxus wallichiana leaf extract
Source: PeerJ. 2022 Nov 23;10:e14391. doi: 10.7717/peerj.14391 (PMC9700453; doi:10.7717/peerj.14391)
Supplement: Supplemental Information 3 [file peerj-10-14391-s003.xlsx]

## Sheet: Sheet1
##TITLE=Ag2O
##DATA TYPE=INFRARED SPECTRUM
##XUNITS=1/CM
##YUNITS=%T
200.597	36.8663
202.526	38.5275
204.454	31.8298
206.383	29.5274
208.312	31.0252
210.241	39.4606
212.17	41.641
214.099	33.9618
216.027	35.0587
217.956	41.325
219.885	49.2221
221.814	46.7983
223.743	48.5256
225.671	51.3636
227.6	48.1605
229.529	33.825
231.458	33.5334
233.387	33.1748
235.316	36.8157
237.244	31.8466
239.173	22.503
241.102	31.1875
243.031	43.9938
244.96	35.6697
246.888	36.9793
248.817	32.6998
250.746	23.158
252.675	23.2108
254.604	34.2362
256.533	30.2694
258.461	21.0737
260.39	30.2742
262.319	36.7432
264.248	41.1635
266.177	43.5264
268.105	45.6846
270.034	33.028
271.963	29.6961
273.892	37.8873
275.821	38.6817
277.75	41.8114
279.678	52.0672
281.607	41.0308
283.536	34.2145
285.465	36.2586
287.394	25.8234
289.322	25.8255
291.251	24.6926
293.18	27.1538
295.109	41.8389
297.038	40.3656
298.966	37.4941
300.895	32.8538
302.824	32.3534
304.753	33.78
306.682	46.7973
308.611	35.5751
310.539	26.2599
312.468	29.3859
314.397	32.0119
316.326	28.1195
318.255	22.6075
320.183	31.1191
322.112	47.1356
324.041	49.4191
325.97	42.2965
327.899	28.9851
329.828	28.1183
331.756	32.9861
333.685	49.5366
335.614	56.8602
337.543	48.2417
339.472	47.6735
341.4	35.8218
343.329	28.5614
345.258	34.6384
347.187	43.8233
349.116	43.1764
351.045	39.3588
352.973	36.7219
354.902	40.449
356.831	30.604
358.76	20.6719
360.689	25.6933
362.617	37.1929
364.546	32.2278
366.475	31.0157
368.404	41.4638
370.333	35.4688
372.261	29.6653
374.19	35.2857
376.119	32.3469
378.048	34.4054
379.977	34.2779
381.906	28.1251
383.834	35.228
385.763	39.9642
387.692	30.3008
389.621	29.5696
391.55	28.1255
393.478	30.1947
395.407	33.9783
397.336	28.4097
399.265	28.3689
401.194	28.1242
403.123	26.1385
405.051	23.6218
406.98	22.768
408.909	22.1897
410.838	24.2806
412.767	23.5798
414.695	22.3712
416.624	23.0501
418.553	26.5156
420.482	25.3937
422.411	20.7886
424.34	19.588
426.268	19.1731
428.197	19.0194
430.126	19.8022
432.055	19.9888
433.984	19.1198
435.912	18.3915
437.841	19.1676
439.77	19.5157
441.699	18.7553
443.628	18.2219
445.556	18.3026
447.485	17.7756
449.414	17.1892
451.343	16.9912
453.272	16.9792
455.201	16.3001
457.129	16.2937
459.058	17.1106
460.987	16.9994
462.916	16.8286
464.845	17.2852
466.773	16.8435
468.702	16.9488
470.631	16.989
472.56	16.2807
474.489	16.5352
476.418	16.6038
478.346	16.4718
480.275	16.422
482.204	16.2869
484.133	16.0566
486.062	16.4478
487.99	16.6222
489.919	16.4933
491.848	16.6422
493.777	16.4984
495.706	16.1046
497.635	16.1581
499.563	16.5864
501.492	16.2489
503.421	16.236
505.35	16.621
507.279	16.8593
509.207	16.7692
511.136	17.078
513.065	17.4103
514.994	17.2114
516.923	16.972
518.852	17.3628
520.78	17.7068
522.709	18.0343
524.638	18.1864
526.567	18.4609
528.496	19.0743
530.424	19.5022
532.353	19.7025
534.282	20.5763
536.211	21.6539
538.14	22.2357
540.068	22.8274
541.997	23.7755
543.926	24.4462
545.855	25.2065
547.784	26.5194
549.713	27.9124
551.641	28.9275
553.57	30.2637
555.499	31.9963
557.428	33.7191
559.357	35.5104
561.285	37.4562
563.214	39.3106
565.143	41.3577
567.072	43.3367
569.001	45.6543
570.93	48.1245
572.858	50.4005
574.787	52.3508
576.716	54.3082
578.645	55.9264
580.574	56.9459
582.502	58.3808
584.431	59.5558
586.36	60.4118
588.289	60.965
590.218	60.9525
592.147	60.909
594.075	61.2992
596.004	61.3943
597.933	61.1427
599.862	60.7537
601.791	60.4526
603.719	60.1316
605.648	59.6298
607.577	59.0146
609.506	58.4153
611.435	57.6268
613.363	56.7352
615.292	55.7744
617.221	55.0679
619.15	54.4656
621.079	53.8583
623.008	53.2722
624.936	52.2457
626.865	51.522
628.794	50.8762
630.723	50.0224
632.652	49.2586
634.58	48.6433
636.509	48.0459
638.438	47.4293
640.367	46.9137
642.296	46.4763
644.225	45.98
646.153	45.4415
648.082	44.985
650.011	44.5514
651.94	44.2724
653.869	43.8847
655.797	43.6764
657.726	43.5711
659.655	43.2723
661.584	43.1203
663.513	43.1176
665.442	43.1492
667.37	42.4269
669.299	41.0403
671.228	41.8662
673.157	42.1355
675.086	41.8953
677.014	41.6311
678.943	41.4101
680.872	41.1913
682.801	41.0199
684.73	40.8459
686.658	40.6045
688.587	40.3159
690.516	40.1335
692.445	40.0834
694.374	40.0579
696.303	39.9104
698.231	39.7155
700.16	39.6312
702.089	39.5347
704.018	39.3321
705.947	39.0773
707.875	38.8602
709.804	38.6117
711.733	38.2926
713.662	38.1555
715.591	38.1922
717.52	37.9717
719.448	37.298
721.377	37.0113
723.306	37.6821
725.235	38.3708
727.164	38.5012
729.092	38.4395
731.021	38.2327
732.95	38.063
734.879	37.9999
736.808	38.0027
738.737	37.8486
740.665	37.6302
742.594	37.4946
744.523	37.3641
746.452	37.3048
748.381	37.1466
750.309	37.0272
752.238	36.93
754.167	36.7397
756.096	36.6215
758.025	36.5418
759.954	36.556
761.882	36.5185
763.811	36.3833
765.74	36.1861
767.669	36.0535
769.598	35.9755
771.526	35.8519
773.455	35.7314
775.384	35.6306
777.313	35.4698
779.242	35.294
781.17	35.0736
783.099	34.7754
785.028	34.6071
786.957	34.7019
788.886	34.6228
790.815	34.3865
792.743	34.1538
794.672	33.6933
796.601	32.798
798.53	31.3191
800.459	30.1941
802.387	31.2437
804.316	33.8682
806.245	36.059
808.174	36.7975
810.103	36.626
812.032	36.3692
813.96	36.2223
815.889	36.0039
817.818	35.7868
819.747	35.6273
821.676	35.4758
823.604	35.3644
825.533	35.1976
827.462	34.9951
829.391	34.8684
831.32	34.9268
833.249	34.912
835.177	34.731
837.106	34.5772
839.035	34.5662
840.964	34.5739
842.893	34.4852
844.821	34.4238
846.75	34.4151
848.679	34.417
850.608	34.3849
852.537	34.2874
854.465	34.2354
856.394	34.2216
858.323	34.2156
860.252	34.1623
862.181	34.1487
864.11	34.1378
866.038	34.1304
867.967	34.086
869.896	34.0205
871.825	34.0295
873.754	34.0161
875.682	33.9925
877.611	33.9624
879.54	33.9522
881.469	33.885
883.398	33.7758
885.327	33.6604
887.255	33.5993
889.184	33.5957
891.113	33.5513
893.042	33.5211
894.971	33.4529
896.899	33.3898
898.828	33.3514
900.757	33.3295
902.686	33.3351
904.615	33.2929
906.544	33.2289
908.472	33.178
910.401	33.1303
912.33	33.0756
914.259	33.0435
916.188	32.9957
918.116	32.9532
920.045	32.9057
921.974	32.8611
923.903	32.7951
925.832	32.7454
927.76	32.7133
929.689	32.6449
931.618	32.561
933.547	32.514
935.476	32.463
937.405	32.416
939.333	32.3765
941.262	32.2949
943.191	32.2243
945.12	32.1476
947.049	32.0653
948.977	32.0133
950.906	31.9422
952.835	31.8871
954.764	31.8561
956.693	31.8264
958.622	31.75
960.55	31.6973
962.479	31.6334
964.408	31.5952
966.337	31.5303
968.266	31.4719
970.194	31.4481
972.123	31.4003
974.052	31.3781
975.981	31.3425
977.91	31.3261
979.839	31.2832
981.767	31.2435
983.696	31.2342
985.625	31.2181
987.554	31.2415
989.483	31.2493
991.411	31.2695
993.34	31.2882
995.269	31.3159
997.198	31.3095
999.127	31.287
1001.06	31.2464
1002.98	31.267
1004.91	31.2597
1006.84	31.2205
1008.77	31.1918
1010.7	31.184
1012.63	31.1633
1014.56	31.1759
1016.49	31.1967
1018.41	31.2084
1020.34	31.2466
1022.27	31.2907
1024.2	31.3249
1026.13	31.3551
1028.06	31.3834
1029.99	31.3756
1031.92	31.3033
1033.85	31.3402
1035.77	31.472
1037.7	31.5629
1039.63	31.558
1041.56	31.5481
1043.49	31.5237
1045.42	31.5313
1047.35	31.521
1049.28	31.4707
1051.2	31.4692
1053.13	31.4702
1055.06	31.4348
1056.99	31.3661
1058.92	31.3391
1060.85	31.2694
1062.78	31.1207
1064.71	30.9866
1066.64	30.7792
1068.56	30.4211
1070.49	29.9622
1072.42	30.2331
1074.35	31.0665
1076.28	31.5132
1078.21	31.5926
1080.14	31.6166
1082.07	31.5874
1083.99	31.5311
1085.92	31.5327
1087.85	31.5049
1089.78	31.4659
1091.71	31.4579
1093.64	31.4641
1095.57	31.4369
1097.5	31.4074
1099.43	31.3525
1101.35	31.2782
1103.28	31.2781
1105.21	31.2777
1107.14	31.3092
1109.07	31.3027
1111	31.2741
1112.93	31.2863
1114.86	31.311
1116.78	31.3132
1118.71	31.3048
1120.64	31.3126
1122.57	31.289
1124.5	31.2882
1126.43	31.3314
1128.36	31.3435
1130.29	31.3087
1132.21	31.2859
1134.14	31.2802
1136.07	31.274
1138	31.2893
1139.93	31.2827
1141.86	31.2677
1143.79	31.2821
1145.72	31.2729
1147.65	31.257
1149.57	31.271
1151.5	31.2718
1153.43	31.2674
1155.36	31.2673
1157.29	31.2589
1159.22	31.2329
1161.15	31.2179
1163.08	31.2113
1165	31.1894
1166.93	31.1887
1168.86	31.157
1170.79	31.1346
1172.72	31.111
1174.65	31.081
1176.58	31.0756
1178.51	31.066
1180.44	31.086
1182.36	31.0934
1184.29	31.0822
1186.22	31.0581
1188.15	31.0777
1190.08	31.0608
1192.01	31.0178
1193.94	31.0197
1195.87	31.0121
1197.79	30.9924
1199.72	30.9634
1201.65	30.9583
1203.58	30.9589
1205.51	30.9535
1207.44	30.9419
1209.37	30.9062
1211.3	30.8606
1213.23	30.8517
1215.15	30.8803
1217.08	30.8514
1219.01	30.84
1220.94	30.8256
1222.87	30.796
1224.8	30.7414
1226.73	30.7131
1228.66	30.6984
1230.58	30.6774
1232.51	30.6257
1234.44	30.5722
1236.37	30.5336
1238.3	30.4834
1240.23	30.4374
1242.16	30.3929
1244.09	30.3225
1246.02	30.2787
1247.94	30.2479
1249.87	30.2188
1251.8	30.1857
1253.73	30.1508
1255.66	30.0877
1257.59	30.0225
1259.52	29.911
1261.45	29.9003
1263.37	29.8991
1265.3	29.8247
1267.23	29.7386
1269.16	29.6441
1271.09	29.5315
1273.02	29.531
1274.95	29.543
1276.88	29.4671
1278.81	29.3428
1280.73	29.2256
1282.66	29.1376
1284.59	29.0242
1286.52	28.8407
1288.45	28.6748
1290.38	28.6257
1292.31	28.5863
1294.24	28.4837
1296.16	28.3487
1298.09	28.2513
1300.02	28.1691
1301.95	28.0285
1303.88	27.857
1305.81	27.6554
1307.74	27.429
1309.67	27.2287
1311.59	26.8788
1313.52	26.5142
1315.45	26.3261
1317.38	26.0274
1319.31	25.7653
1321.24	25.7997
1323.17	25.904
1325.1	25.9759
1327.03	26.0984
1328.95	26.2272
1330.88	26.4185
1332.81	26.6695
1334.74	26.842
1336.67	26.7506
1338.6	26.443
1340.53	26.7766
1342.46	27.7012
1344.38	28.1487
1346.31	28.4295
1348.24	28.6672
1350.17	28.8926
1352.1	29.1004
1354.03	29.1666
1355.96	29.2999
1357.89	29.5056
1359.82	29.4466
1361.74	29.0613
1363.67	29.2583
1365.6	29.9353
1367.53	30.0045
1369.46	29.9849
1371.39	30.0691
1373.32	29.7099
1375.25	29.6297
1377.17	30.0329
1379.1	30.1482
1381.03	30.3072
1382.96	30.3687
1384.89	30.1631
1386.82	29.5713
1388.75	29.6315
1390.68	29.8976
1392.61	29.6749
1394.53	28.9157
1396.46	28.6094
1398.39	28.6549
1400.32	29.0604
1402.25	29.4794
1404.18	29.3302
1406.11	29.4669
1408.04	29.8671
1409.96	29.9589
1411.89	30.1305
1413.82	30.4431
1415.75	30.3192
1417.68	29.7843
1419.61	29.9908
1421.54	30.8486
1423.47	31.0176
1425.4	31.4412
1427.32	31.8619
1429.25	31.7355
1431.18	31.9129
1433.11	32.1775
1435.04	32.0674
1436.97	31.9747
1438.9	32.9347
1440.83	33.4993
1442.75	33.7536
1444.68	33.8797
1446.61	33.7293
1448.54	33.7425
1450.47	34.1766
1452.4	34.1944
1454.33	33.8132
1456.26	32.4607
1458.18	32.3596
1460.11	34.3449
1462.04	35.2836
1463.97	35.1282
1465.9	35.1882
1467.83	35.8187
1469.76	35.8868
1471.69	34.8647
1473.62	34.2304
1475.54	35.1792
1477.47	36.0833
1479.4	36.5817
1481.33	36.5407
1483.26	36.7769
1485.19	36.659
1487.12	35.7988
1489.05	34.7209
1490.97	35.2498
1492.9	36.5075
1494.83	36.4692
1496.76	35.5692
1498.69	35.5555
1500.62	35.9701
1502.55	36.178
1504.48	35.8446
1506.41	33.2872
1508.33	32.3332
1510.26	34.2968
1512.19	35.339
1514.12	35.4749
1516.05	34.5936
1517.98	34.358
1519.91	34.3691
1521.84	33.3146
1523.76	34.1838
1525.69	34.4902
1527.62	34.9784
1529.55	35.7629
1531.48	35.7398
1533.41	34.9024
1535.34	35.3387
1537.27	35.5677
1539.2	34.1093
1541.12	32.3329
1543.05	33.2679
1544.98	34.2786
1546.91	35.6573
1548.84	35.7045
1550.77	35.3535
1552.7	35.4935
1554.63	34.8769
1556.55	34.4418
1558.48	33.072
1560.41	34.1225
1562.34	35.5512
1564.27	35.8344
1566.2	35.92
1568.13	35.7485
1570.06	35.3379
1571.99	36.0553
1573.91	36.121
1575.84	35.2905
1577.77	35.5078
1579.7	36.4095
1581.63	36.6844
1583.56	36.7166
1585.49	36.7342
1587.42	36.7317
1589.34	36.6491
1591.27	36.6003
1593.2	36.5038
1595.13	36.3811
1597.06	36.5337
1598.99	36.6747
1600.92	36.5214
1602.85	36.3546
1604.77	36.4056
1606.7	36.293
1608.63	36.136
1610.56	36.327
1612.49	36.4648
1614.42	36.1994
1616.35	35.4457
1618.28	35.6447
1620.21	36.0317
1622.13	35.6192
1624.06	35.4037
1625.99	35.8928
1627.92	35.8893
1629.85	36.1732
1631.78	36.3617
1633.71	35.9815
1635.64	34.635
1637.56	34.869
1639.49	35.8308
1641.42	36.1297
1643.35	36.0418
1645.28	35.2836
1647.21	33.9348
1649.14	34.876
1651.07	35.2598
1653	33.924
1654.92	34.4879
1656.85	35.7427
1658.78	36.2509
1660.71	36.0525
1662.64	35.5594
1664.57	35.967
1666.5	36.1331
1668.43	35.2959
1670.35	34.672
1672.28	35.2126
1674.21	35.3526
1676.14	35.3636
1678.07	35.6211
1680	35.0956
1681.93	34.612
1683.86	33.7602
1685.79	34.3074
1687.71	34.9359
1689.64	35.1657
1691.57	35.6469
1693.5	35.6468
1695.43	34.6084
1697.36	33.6601
1699.29	33.8767
1701.22	34.1949
1703.14	34.6943
1705.07	34.6019
1707	34.9506
1708.93	35.5511
1710.86	35.6824
1712.79	35.4175
1714.72	34.3549
1716.65	33.4612
1718.58	34.2053
1720.5	35.516
1722.43	35.8224
1724.36	35.9305
1726.29	36.1829
1728.22	35.9497
1730.15	35.213
1732.08	34.6855
1734.01	34.1344
1735.93	35.0466
1737.86	35.5137
1739.79	35.3187
1741.72	35.397
1743.65	35.1237
1745.58	35.0288
1747.51	34.6812
1749.44	34.3917
1751.36	34.9048
1753.29	35.8205
1755.22	36.0946
1757.15	35.7296
1759.08	35.858
1761.01	35.7382
1762.94	35.7695
1764.87	36.2517
1766.8	36.0928
1768.72	35.5912
1770.65	35.1958
1772.58	34.6528
1774.51	35.2531
1776.44	35.6702
1778.37	35.7009
1780.3	35.3345
1782.23	35.4248
1784.15	35.5416
1786.08	35.601
1788.01	35.7193
1789.94	35.2917
1791.87	34.6099
1793.8	34.8742
1795.73	35.2191
1797.66	35.431
1799.59	35.3881
1801.51	35.2893
1803.44	35.7839
1805.37	36.1574
1807.3	36.1344
1809.23	35.9466
1811.16	35.8012
1813.09	36.0692
1815.02	36.3964
1816.94	36.3488
1818.87	36.3836
1820.8	36.405
1822.73	36.2333
1824.66	35.9076
1826.59	35.9146
1828.52	35.7697
1830.45	35.5256
1832.38	36.1044
1834.3	36.3295
1836.23	36.2331
1838.16	36.2205
1840.09	36.3102
1842.02	35.9886
1843.95	35.3834
1845.88	35.4711
1847.81	35.8783
1849.73	36.3373
1851.66	36.6379
1853.59	36.6086
1855.52	36.5775
1857.45	36.5136
1859.38	36.4741
1861.31	36.5172
1863.24	36.615
1865.17	36.403
1867.09	35.7267
1869.02	35.2862
1870.95	35.9735
1872.88	36.5725
1874.81	36.6763
1876.74	36.6942
1878.67	36.7808
1880.6	36.7631
1882.52	36.726
1884.45	36.6488
1886.38	36.6122
1888.31	36.4471
1890.24	36.3371
1892.17	36.4929
1894.1	36.3732
1896.03	36.4593
1897.95	36.8023
1899.88	36.8926
1901.81	36.8506
1903.74	36.83
1905.67	36.8265
1907.6	36.687
1909.53	36.6181
1911.46	36.8008
1913.39	36.9168
1915.31	36.8696
1917.24	36.6733
1919.17	36.5668
1921.1	36.5902
1923.03	36.5524
1924.96	36.9792
1926.89	37.1845
1928.82	37.251
1930.74	37.3036
1932.67	37.3013
1934.6	37.2645
1936.53	37.3625
1938.46	37.2749
1940.39	37.1653
1942.32	36.8511
1944.25	36.8931
1946.18	37.0784
1948.1	37.2887
1950.03	37.5592
1951.96	37.6254
1953.89	37.5267
1955.82	37.3984
1957.75	37.3602
1959.68	37.6243
1961.61	37.9107
1963.53	37.8411
1965.46	37.6772
1967.39	37.6025
1969.32	37.9528
1971.25	38.3224
1973.18	38.4058
1975.11	38.421
1977.04	38.4307
1978.97	38.2659
1980.89	38.2915
1982.82	38.0867
1984.75	38.0588
1986.68	38.2434
1988.61	37.9367
1990.54	37.7006
1992.47	37.6514
1994.4	37.8678
1996.32	38.0729
1998.25	38.1582
2000.18	38.4324
2002.11	38.5347
2004.04	38.3789
2005.97	38.4095
2007.9	38.3425
2009.83	38.372
2011.76	38.3446
2013.68	38.3431
2015.61	38.2611
2017.54	38.1804
2019.47	38.2718
2021.4	38.1102
2023.33	38.083
2025.26	38.3835
2027.19	38.6587
2029.11	38.788
2031.04	38.3812
2032.97	38.2585
2034.9	38.4102
2036.83	38.472
2038.76	38.5337
2040.69	38.4533
2042.62	38.3558
2044.54	38.3885
2046.47	38.2683
2048.4	38.1164
2050.33	37.8785
2052.26	37.7926
2054.19	38.015
2056.12	38.0378
2058.05	37.7835
2059.98	37.7784
2061.9	37.91
2063.83	37.8451
2065.76	37.767
2067.69	37.9265
2069.62	38.0094
2071.55	37.9523
2073.48	37.9558
2075.41	37.821
2077.33	37.9175
2079.26	38.0246
2081.19	37.9422
2083.12	37.9141
2085.05	37.9529
2086.98	37.9407
2088.91	37.9185
2090.84	37.912
2092.77	38.0228
2094.69	38.1004
2096.62	37.9549
2098.55	37.8743
2100.48	37.8748
2102.41	37.9586
2104.34	38.0834
2106.27	38.0673
2108.2	38.0561
2110.12	38.1115
2112.05	38.096
2113.98	37.9735
2115.91	37.9544
2117.84	38.1196
2119.77	38.2313
2121.7	38.2054
2123.63	38.1993
2125.56	38.3221
2127.48	38.3539
2129.41	38.3095
2131.34	38.3796
2133.27	38.4424
2135.2	38.5361
2137.13	38.631
2139.06	38.6861
2140.99	38.8328
2142.91	38.8593
2144.84	38.8403
2146.77	38.9666
2148.7	39.2416
2150.63	39.2705
2152.56	39.541
2154.49	39.6268
2156.42	39.898
2158.35	39.9431
2160.27	39.62
2162.2	39.605
2164.13	39.7871
2166.06	39.757
2167.99	39.3143
2169.92	39.1144
2171.85	39.1435
2173.78	38.9755
2175.7	38.8741
2177.63	38.9224
2179.56	38.9746
2181.49	38.9602
2183.42	39.0571
2185.35	39.2421
2187.28	39.1527
2189.21	39.058
2191.13	39.0463
2193.06	39.0111
2194.99	39.0349
2196.92	38.9795
2198.85	39.0248
2200.78	38.9338
2202.71	38.8287
2204.64	38.7565
2206.57	38.6729
2208.49	38.673
2210.42	38.9376
2212.35	38.9314
2214.28	38.9333
2216.21	38.9311
2218.14	38.8397
2220.07	38.8631
2222	38.8056
2223.92	38.6855
2225.85	38.6332
2227.78	38.6917
2229.71	38.7433
2231.64	38.7517
2233.57	38.7283
2235.5	38.6711
2237.43	38.6587
2239.36	38.6073
2241.28	38.6804
2243.21	38.6689
2245.14	38.6052
2247.07	38.6606
2249	38.6504
2250.93	38.5983
2252.86	38.7138
2254.79	38.6313
2256.71	38.4389
2258.64	38.4447
2260.57	38.5576
2262.5	38.5822
2264.43	38.5936
2266.36	38.588
2268.29	38.6251
2270.22	38.6174
2272.15	38.553
2274.07	38.4667
2276	38.5295
2277.93	38.5475
2279.86	38.5309
2281.79	38.5422
2283.72	38.5311
2285.65	38.4564
2287.58	38.3407
2289.5	38.2305
2291.43	38.1493
2293.36	38.0144
2295.29	37.8521
2297.22	37.7897
2299.15	37.7218
2301.08	37.537
2303.01	37.4239
2304.94	37.2802
2306.86	37.0255
2308.79	36.7061
2310.72	36.5407
2312.65	36.5358
2314.58	36.5307
2316.51	36.4239
2318.44	36.2434
2320.37	35.8975
2322.29	35.6276
2324.22	35.5569
2326.15	35.4298
2328.08	35.2649
2330.01	35.2451
2331.94	35.2569
2333.87	35.2245
2335.8	35.1896
2337.72	35.157
2339.65	35.1331
2341.58	34.8454
2343.51	34.8076
2345.44	35.1384
2347.37	35.6069
2349.3	35.7829
2351.23	35.4809
2353.16	34.9057
2355.08	34.311
2357.01	33.8156
2358.94	33.7656
2360.87	33.5342
2362.8	33.4029
2364.73	33.5846
2366.66	33.8935
2368.59	34.4064
2370.51	34.997
2372.44	35.5256
2374.37	36.0001
2376.3	36.3934
2378.23	36.8313
2380.16	37.2933
2382.09	37.674
2384.02	38.0292
2385.95	38.3998
2387.87	38.6082
2389.8	38.6762
2391.73	38.7575
2393.66	38.8289
2395.59	38.8623
2397.52	38.8479
2399.45	38.8968
2401.38	38.9624
2403.3	38.983
2405.23	38.9363
2407.16	38.9326
2409.09	39.0042
2411.02	39.0692
2412.95	39.049
2414.88	39.011
2416.81	39.0065
2418.74	39.0534
2420.66	39.0851
2422.59	39.0742
2424.52	39.0395
2426.45	39.0108
2428.38	39.0097
2430.31	39.0658
2432.24	39.1185
2434.17	39.1264
2436.09	39.0957
2438.02	39.0599
2439.95	39.0549
2441.88	39.0459
2443.81	39.0274
2445.74	39.045
2447.67	39.0693
2449.6	39.0507
2451.53	39.0429
2453.45	39.0664
2455.38	39.1023
2457.31	39.1152
2459.24	39.1543
2461.17	39.2305
2463.1	39.2357
2465.03	39.1889
2466.96	39.1707
2468.88	39.2556
2470.81	39.3128
2472.74	39.3299
2474.67	39.335
2476.6	39.3215
2478.53	39.3409
2480.46	39.3473
2482.39	39.3163
2484.32	39.3684
2486.24	39.393
2488.17	39.3654
2490.1	39.3691
2492.03	39.3875
2493.96	39.4556
2495.89	39.5272
2497.82	39.4835
2499.75	39.4234
2501.67	39.4491
2503.6	39.483
2505.53	39.4769
2507.46	39.4765
2509.39	39.4818
2511.32	39.5125
2513.25	39.5145
2515.18	39.5041
2517.1	39.5212
2519.03	39.5296
2520.96	39.5681
2522.89	39.6463
2524.82	39.7409
2526.75	39.7377
2528.68	39.6771
2530.61	39.674
2532.54	39.6728
2534.46	39.6432
2536.39	39.6513
2538.32	39.6774
2540.25	39.6904
2542.18	39.7131
2544.11	39.7554
2546.04	39.7868
2547.97	39.7461
2549.89	39.7314
2551.82	39.745
2553.75	39.7497
2555.68	39.7609
2557.61	39.7964
2559.54	39.7995
2561.47	39.8076
2563.4	39.7911
2565.33	39.7814
2567.25	39.848
2569.18	39.8656
2571.11	39.8386
2573.04	39.8484
2574.97	39.88
2576.9	39.8761
2578.83	39.8649
2580.76	39.8665
2582.68	39.949
2584.61	40.046
2586.54	40.0281
2588.47	39.9715
2590.4	39.9933
2592.33	40.0129
2594.26	40.0524
2596.19	40.106
2598.12	40.1183
2600.04	40.1342
2601.97	40.1223
2603.9	40.0903
2605.83	40.0772
2607.76	40.0898
2609.69	40.109
2611.62	40.1324
2613.55	40.1417
2615.47	40.1518
2617.4	40.193
2619.33	40.1954
2621.26	40.1577
2623.19	40.1808
2625.12	40.2276
2627.05	40.2143
2628.98	40.203
2630.91	40.2527
2632.83	40.2538
2634.76	40.2564
2636.69	40.2889
2638.62	40.3364
2640.55	40.3683
2642.48	40.3709
2644.41	40.3888
2646.34	40.4452
2648.26	40.4992
2650.19	40.5032
2652.12	40.5072
2654.05	40.523
2655.98	40.5331
2657.91	40.5973
2659.84	40.624
2661.77	40.6086
2663.69	40.6008
2665.62	40.6274
2667.55	40.6544
2669.48	40.6729
2671.41	40.6608
2673.34	40.6657
2675.27	40.655
2677.2	40.6562
2679.13	40.6738
2681.05	40.6733
2682.98	40.6713
2684.91	40.6684
2686.84	40.6707
2688.77	40.6639
2690.7	40.6723
2692.63	40.6921
2694.56	40.6611
2696.48	40.6454
2698.41	40.6615
2700.34	40.6819
2702.27	40.6833
2704.2	40.6928
2706.13	40.6899
2708.06	40.7083
2709.99	40.7337
2711.92	40.739
2713.84	40.7291
2715.77	40.7149
2717.7	40.7254
2719.63	40.7531
2721.56	40.7575
2723.49	40.7737
2725.42	40.7793
2727.35	40.7875
2729.27	40.7914
2731.2	40.8228
2733.13	40.8316
2735.06	40.8199
2736.99	40.8413
2738.92	40.8792
2740.85	40.8835
2742.78	40.8819
2744.71	40.8983
2746.63	40.8977
2748.56	40.8948
2750.49	40.9064
2752.42	40.9
2754.35	40.9014
2756.28	40.9123
2758.21	40.9287
2760.14	40.9319
2762.06	40.944
2763.99	40.9437
2765.92	40.9462
2767.85	40.9428
2769.78	40.9552
2771.71	40.9705
2773.64	40.9864
2775.57	40.9927
2777.5	41.011
2779.42	41.0211
2781.35	41.0673
2783.28	41.0774
2785.21	41.083
2787.14	41.071
2789.07	41.0701
2791	41.0889
2792.93	41.1041
2794.85	41.0728
2796.78	41.0895
2798.71	41.1184
2800.64	41.1331
2802.57	41.1466
2804.5	41.1587
2806.43	41.1533
2808.36	41.1721
2810.28	41.1861
2812.21	41.1857
2814.14	41.1996
2816.07	41.2031
2818	41.1935
2819.93	41.1999
2821.86	41.199
2823.79	41.2417
2825.72	41.2887
2827.64	41.2767
2829.57	41.2663
2831.5	41.2986
2833.43	41.3017
2835.36	41.3202
2837.29	41.3652
2839.22	41.3852
2841.15	41.4203
2843.07	41.4835
2845	41.5387
2846.93	41.6232
2848.86	41.6872
2850.79	41.7005
2852.72	41.6793
2854.65	41.657
2856.58	41.6297
2858.51	41.6328
2860.43	41.6061
2862.36	41.5594
2864.29	41.5492
2866.22	41.5797
2868.15	41.5999
2870.08	41.6079
2872.01	41.5928
2873.94	41.6243
2875.86	41.6443
2877.79	41.6449
2879.72	41.6285
2881.65	41.6558
2883.58	41.6817
2885.51	41.6949
2887.44	41.7118
2889.37	41.735
2891.3	41.7217
2893.22	41.7267
2895.15	41.7438
2897.08	41.7614
2899.01	41.7726
2900.94	41.7893
2902.87	41.8093
2904.8	41.802
2906.73	41.8154
2908.65	41.8433
2910.58	41.904
2912.51	41.9886
2914.44	42.07
2916.37	42.1325
2918.3	42.1603
2920.23	42.1339
2922.16	42.1066
2924.09	42.1022
2926.01	42.0564
2927.94	42.0314
2929.87	42.0198
2931.8	42.0046
2933.73	41.9611
2935.66	41.9219
2937.59	41.9066
2939.52	41.9076
2941.44	41.9174
2943.37	41.9093
2945.3	41.8887
2947.23	41.88
2949.16	41.8977
2951.09	41.8843
2953.02	41.8783
2954.95	41.9078
2956.87	41.9273
2958.8	41.9342
2960.73	41.9522
2962.66	41.9487
2964.59	41.9266
2966.52	41.8894
2968.45	41.8861
2970.38	41.8915
2972.31	41.8655
2974.23	41.8669
2976.16	41.8823
2978.09	41.8933
2980.02	41.8961
2981.95	41.9107
2983.88	41.955
2985.81	41.9698
2987.74	41.9339
2989.66	41.9535
2991.59	41.95
2993.52	41.9223
2995.45	41.9495
2997.38	42.0164
2999.31	42.0251
3001.24	42.0352
3003.17	42.0024
3005.1	42.0257
3007.02	42.0492
3008.95	42.0003
3010.88	41.9423
3012.81	41.9153
3014.74	41.963
3016.67	42.007
3018.6	42.0434
3020.53	42.0533
3022.45	42.0726
3024.38	42.0652
3026.31	42.0475
3028.24	42.066
3030.17	42.0216
3032.1	41.9679
3034.03	41.9825
3035.96	42.068
3037.89	42.1692
3039.81	42.2013
3041.74	42.2262
3043.67	42.2138
3045.6	42.1725
3047.53	42.1615
3049.46	42.1588
3051.39	42.2192
3053.32	42.281
3055.24	42.2833
3057.17	42.24
3059.1	42.2938
3061.03	42.2756
3062.96	42.1805
3064.89	42.1487
3066.82	42.2199
3068.75	42.282
3070.68	42.3568
3072.6	42.3481
3074.53	42.3301
3076.46	42.3253
3078.39	42.307
3080.32	42.2903
3082.25	42.3131
3084.18	42.3761
3086.11	42.3596
3088.03	42.3563
3089.96	42.392
3091.89	42.3598
3093.82	42.3598
3095.75	42.3057
3097.68	42.3358
3099.61	42.3085
3101.54	42.3075
3103.46	42.3816
3105.39	42.3867
3107.32	42.3921
3109.25	42.4639
3111.18	42.4064
3113.11	42.3591
3115.04	42.3555
3116.97	42.3669
3118.9	42.4194
3120.82	42.4747
3122.75	42.4273
3124.68	42.4552
3126.61	42.4852
3128.54	42.5369
3130.47	42.5727
3132.4	42.5304
3134.33	42.5374
3136.25	42.628
3138.18	42.6376
3140.11	42.6229
3142.04	42.6213
3143.97	42.6419
3145.9	42.6798
3147.83	42.7184
3149.76	42.6747
3151.69	42.6592
3153.61	42.7173
3155.54	42.7085
3157.47	42.6766
3159.4	42.65
3161.33	42.686
3163.26	42.7694
3165.19	42.7856
3167.12	42.7282
3169.04	42.6853
3170.97	42.6766
3172.9	42.6917
3174.83	42.7132
3176.76	42.7261
3178.69	42.7144
3180.62	42.7293
3182.55	42.8528
3184.48	42.8613
3186.4	42.9065
3188.33	42.9634
3190.26	42.9033
3192.19	42.8459
3194.12	42.9014
3196.05	42.8532
3197.98	42.7745
3199.91	42.8431
3201.83	42.8549
3203.76	42.8504
3205.69	42.943
3207.62	42.9618
3209.55	42.907
3211.48	42.9489
3213.41	42.9267
3215.34	42.887
3217.27	42.9619
3219.19	42.9296
3221.12	42.9275
3223.05	42.942
3224.98	42.9191
3226.91	42.9231
3228.84	42.9418
3230.77	42.979
3232.7	43.0198
3234.62	42.9881
3236.55	43.0091
3238.48	43.0493
3240.41	43.0619
3242.34	43.0599
3244.27	43.0263
3246.2	43.1027
3248.13	43.2556
3250.05	43.2311
3251.98	43.1802
3253.91	43.159
3255.84	43.1649
3257.77	43.1625
3259.7	43.1706
3261.63	43.2408
3263.56	43.2794
3265.49	43.2584
3267.41	43.2482
3269.34	43.2421
3271.27	43.2914
3273.2	43.2575
3275.13	43.1709
3277.06	43.1579
3278.99	43.2146
3280.92	43.2562
3282.84	43.2252
3284.77	43.2013
3286.7	43.288
3288.63	43.2814
3290.56	43.2897
3292.49	43.2929
3294.42	43.3574
3296.35	43.3651
3298.28	43.3776
3300.2	43.399
3302.13	43.4086
3304.06	43.429
3305.99	43.4041
3307.92	43.291
3309.85	43.2927
3311.78	43.3881
3313.71	43.3734
3315.63	43.3672
3317.56	43.3496
3319.49	43.37
3321.42	43.4442
3323.35	43.4511
3325.28	43.428
3327.21	43.4
3329.14	43.4175
3331.07	43.4154
3332.99	43.4451
3334.92	43.4483
3336.85	43.4012
3338.78	43.4252
3340.71	43.4525
3342.64	43.4819
3344.57	43.5194
3346.5	43.4864
3348.42	43.5416
3350.35	43.5473
3352.28	43.5236
3354.21	43.4942
3356.14	43.4303
3358.07	43.462
3360	43.4593
3361.93	43.3832
3363.86	43.3278
3365.78	43.3048
3367.71	43.4237
3369.64	43.4975
3371.57	43.6323
3373.5	43.6235
3375.43	43.5461
3377.36	43.5351
3379.29	43.6154
3381.21	43.6454
3383.14	43.5837
3385.07	43.5008
3387	43.5823
3388.93	43.603
3390.86	43.5327
3392.79	43.3815
3394.72	43.47
3396.64	43.5038
3398.57	43.5046
3400.5	43.6323
3402.43	43.6212
3404.36	43.5737
3406.29	43.6495
3408.22	43.6955
3410.15	43.6889
3412.08	43.7183
3414	43.7264
3415.93	43.7353
3417.86	43.6433
3419.79	43.4112
3421.72	43.3328
3423.65	43.4651
3425.58	43.6446
3427.51	43.7453
3429.43	43.7485
3431.36	43.7006
3433.29	43.6875
3435.22	43.6478
3437.15	43.606
3439.08	43.6052
3441.01	43.5596
3442.94	43.4181
3444.87	43.4417
3446.79	43.3171
3448.72	43.4365
3450.65	43.7259
3452.58	43.815
3454.51	43.7788
3456.44	43.6904
3458.37	43.6161
3460.3	43.5163
3462.22	43.4804
3464.15	43.6608
3466.08	43.7367
3468.01	43.6711
3469.94	43.6678
3471.87	43.6043
3473.8	43.5691
3475.73	43.62
3477.66	43.7347
3479.58	43.5649
3481.51	43.2708
3483.44	43.325
3485.37	43.614
3487.3	43.609
3489.23	43.6026
3491.16	43.6907
3493.09	43.7319
3495.01	43.677
3496.94	43.6027
3498.87	43.6213
3500.8	43.3836
3502.73	42.8743
3504.66	42.9422
3506.59	43.4889
3508.52	43.4334
3510.45	43.2642
3512.37	43.6058
3514.3	43.8435
3516.23	43.8965
3518.16	43.7671
3520.09	43.7442
3522.02	43.4189
3523.95	42.8349
3525.88	42.9276
3527.8	42.8958
3529.73	43.0968
3531.66	43.4901
3533.59	43.7871
3535.52	43.6411
3537.45	43.4799
3539.38	43.7336
3541.31	43.7533
3543.23	43.3266
3545.16	42.5147
3547.09	42.4448
3549.02	43.1894
3550.95	43.4231
3552.88	43.1398
3554.81	43.5165
3556.74	43.8371
3558.67	43.723
3560.59	43.2764
3562.52	43.0432
3564.45	42.5892
3566.38	41.2898
3568.31	41.34
3570.24	42.8433
3572.17	43.5827
3574.1	43.6595
3576.02	43.4466
3577.95	43.3692
3579.88	43.3832
3581.81	43.5126
3583.74	43.4107
3585.67	42.7517
3587.6	41.4714
3589.53	42.2664
3591.46	43.2072
3593.38	42.8575
3595.31	42.3335
3597.24	42.5534
3599.17	42.6736
3601.1	42.7242
3603.03	43.1625
3604.96	43.4888
3606.89	42.8115
3608.81	42.0489
3610.74	42.407
3612.67	42.1133
3614.6	41.785
3616.53	42.3172
3618.46	41.8548
3620.39	41.7492
3622.32	42.7495
3624.25	43.2083
3626.17	42.8379
3628.1	41.6535
3630.03	40.9515
3631.96	42.5634
3633.89	43.0277
3635.82	43.4445
3637.75	43.6222
3639.68	43.5679
3641.6	43.428
3643.53	43.2853
3645.46	43.0414
3647.39	41.2499
3649.32	39.7496
3651.25	40.8663
3653.18	42.8055
3655.11	43.2766
3657.04	42.9935
3658.96	43.5986
3660.89	43.94
3662.82	44.0485
3664.75	44.0274
3666.68	43.8411
3668.61	42.8145
3670.54	41.3077
3672.47	42.2915
3674.39	42.3376
3676.32	40.8004
3678.25	42.1243
3680.18	43.0076
3682.11	43.6892
3684.04	43.7562
3685.97	43.5555
3687.9	42.7713
3689.83	41.3568
3691.75	41.9122
3693.68	43.0986
3695.61	43.601
3697.54	43.6502
3699.47	43.7585
3701.4	43.3265
3703.33	43.2188
3705.26	43.6062
3707.18	43.5056
3709.11	42.7488
3711.04	41.4141
3712.97	41.7059
3714.9	42.9238
3716.83	43.6432
3718.76	43.4891
3720.69	43.1212
3722.61	42.3649
3724.54	42.1777
3726.47	42.167
3728.4	42.7318
3730.33	43.0639
3732.26	42.1215
3734.19	40.9104
3736.12	40.0996
3738.05	41.4265
3739.97	42.2741
3741.9	42.5123
3743.83	42.1114
3745.76	41.047
3747.69	41.7073
3749.62	41.0971
3751.55	40.4347
3753.48	41.843
3755.4	43.1381
3757.33	43.2564
3759.26	42.9904
3761.19	43.453
3763.12	44.0226
3765.05	43.7238
3766.98	43.6444
3768.91	43.7347
3770.84	43.4564
3772.76	44.2214
3774.69	44.67
3776.62	44.6377
3778.55	44.1949
3780.48	43.8242
3782.41	44.3186
3784.34	44.1286
3786.27	44.0344
3788.19	44.5356
3790.12	44.7507
3792.05	44.8038
3793.98	44.7507
3795.91	44.0389
3797.84	43.3037
3799.77	43.3464
3801.7	42.1298
3803.63	42.8269
3805.55	43.7698
3807.48	43.4534
3809.41	44.1514
3811.34	44.6818
3813.27	44.6602
3815.2	43.8963
3817.13	42.8302
3819.06	43.1453
3820.98	42.2692
3822.91	42.6416
3824.84	43.7871
3826.77	43.7494
3828.7	44.0585
3830.63	44.2874
3832.56	43.7981
3834.49	43.6069
3836.42	43.0431
3838.34	42.228
3840.27	42.1611
3842.2	43.2354
3844.13	43.7837
3846.06	44.3843
3847.99	44.5303
3849.92	43.9629
3851.85	42.937
3853.77	41.185
3855.7	42.4881
3857.63	43.6177
3859.56	44.3806
3861.49	44.1015
3863.42	43.2738
3865.35	42.9553
3867.28	43.8139
3869.2	43.4257
3871.13	42.5863
3873.06	43.4894
3874.99	43.705
3876.92	44.594
3878.85	44.6611
3880.78	43.5546
3882.71	43.6266
3884.64	43.9175
3886.56	43.7446
3888.49	44.6239
3890.42	44.4504
3892.35	43.5901
3894.28	44.1704
3896.21	44.7273
3898.14	44.199
3900.07	43.3359
3901.99	43.1594
3903.92	42.8968
3905.85	43.4677
3907.78	44.7581
3909.71	45.367
3911.64	45.3526
3913.57	45.3278
3915.5	44.9968
3917.43	44.334
3919.35	44.453
3921.28	44.7334
3923.21	44.6589
3925.14	44.3228
3927.07	44.8986
3929	44.9137
3930.93	44.4383
3932.86	44.373
3934.78	44.9429
3936.71	45.354
3938.64	45.351
3940.57	45.342
3942.5	44.8544
3944.43	44.787
3946.36	45.0388
3948.29	44.6441
3950.22	44.6447
3952.14	45.1153
3954.07	45.3749
3956	45.3502
3957.93	45.3409
3959.86	45.3698
3961.79	45.2823
3963.72	45.356
3965.65	45.5941
3967.57	45.5656
3969.5	45.4557
3971.43	45.4528
3973.36	45.4409
3975.29	45.3297
3977.22	45.4496
3979.15	45.6477
3981.08	45.6379
3983.01	45.5821
3984.93	45.6671
3986.86	45.726
3988.79	45.6973
3990.72	45.5629
3992.65	45.6301
3994.58	45.6442
3996.51	45.6999
3998.44	45.8276
4000.36	45.8814

## Sheet: Sheet2
##TITLE=AgNPS
##DATA TYPE=INFRARED SPECTRUM
##XUNITS=1/CM
##YUNITS=%T
200.597	47.4862
202.526	49.3762
204.454	44.6373
206.383	39.7939
208.312	31.2652
210.241	37.6051
212.17	34.5994
214.099	30.1922
216.027	35.3969
217.956	37.5933
219.885	42.1543
221.814	43.5338
223.743	47.0432
225.671	45.4001
227.6	46.396
229.529	38.326
231.458	39.6731
233.387	37.8469
235.316	35.5543
237.244	40.8488
239.173	46.5988
241.102	38.9436
243.031	41.4548
244.96	46.4081
246.888	40.7872
248.817	35.7902
250.746	34.2123
252.675	36.1606
254.604	43.59
256.533	42.3824
258.461	47.7511
260.39	43.5719
262.319	34.6156
264.248	41.2312
266.177	48.6707
268.105	44.3312
270.034	45.4791
271.963	48.6949
273.892	46.1742
275.821	33.0298
277.75	33.7837
279.678	40.0202
281.607	34.6123
283.536	35.3839
285.465	35.3419
287.394	33.1362
289.322	35.5292
291.251	28.9839
293.18	29.7017
295.109	43.1555
297.038	45.3684
298.966	37.1834
300.895	24.3998
302.824	24.6294
304.753	43.7295
306.682	57.5728
308.611	55.2858
310.539	42.7194
312.468	28.8647
314.397	30.3015
316.326	45.0692
318.255	48.2341
320.183	30.6745
322.112	29.9065
324.041	28.7854
325.97	34.2313
327.899	41.1098
329.828	43.9779
331.756	46.921
333.685	42.0729
335.614	34.8335
337.543	35.8098
339.472	46.388
341.4	43.6147
343.329	35.7563
345.258	38.4505
347.187	53.184
349.116	52.5954
351.045	42.1792
352.973	37.2471
354.902	43.2607
356.831	44.6139
358.76	37.8722
360.689	33.4413
362.617	35.8638
364.546	39.166
366.475	40.0566
368.404	43.7493
370.333	47.5061
372.261	45.5353
374.19	38.1336
376.119	26.176
378.048	24.9661
379.977	30.6207
381.906	38.1233
383.834	38.4806
385.763	36.4263
387.692	33.0902
389.621	30.3174
391.55	25.2226
393.478	24.1843
395.407	31.7485
397.336	36.4828
399.265	23.8524
401.194	20.9379
403.123	22.4584
405.051	23.8104
406.98	25.7353
408.909	26.3438
410.838	23.757
412.767	26.3857
414.695	28.7795
416.624	24.4062
418.553	20.1653
420.482	20.4526
422.411	20.7125
424.34	22.4204
426.268	25.0685
428.197	24.6169
430.126	24.3838
432.055	23.9132
433.984	23.8096
435.912	24.0131
437.841	24.3445
439.77	24.5987
441.699	24.8537
443.628	24.1771
445.556	24.3338
447.485	24.536
449.414	24.9397
451.343	24.7309
453.272	24.9493
455.201	25.1079
457.129	24.2348
459.058	24.0418
460.987	24.5916
462.916	24.7578
464.845	25.2923
466.773	25.5432
468.702	25.2992
470.631	25.3987
472.56	25.3362
474.489	26.095
476.418	26.8196
478.346	26.5332
480.275	25.867
482.204	25.4608
484.133	25.6811
486.062	26.1414
487.99	26.5298
489.919	26.5135
491.848	26.0681
493.777	26.2745
495.706	26.303
497.635	26.046
499.563	26.2004
501.492	26.2295
503.421	26.0615
505.35	25.7813
507.279	26.0114
509.207	26.3492
511.136	26.5265
513.065	26.4629
514.994	26.2827
516.923	26.011
518.852	26.1861
520.78	26.9687
522.709	26.9861
524.638	26.3077
526.567	26.2071
528.496	26.6462
530.424	26.822
532.353	26.9928
534.282	27.5114
536.211	27.7074
538.14	27.3823
540.068	27.2882
541.997	27.3104
543.926	27.2402
545.855	27.1441
547.784	27.3157
549.713	27.4552
551.641	27.5707
553.57	27.5383
555.499	27.744
557.428	27.9211
559.357	27.9394
561.285	28.0319
563.214	27.8431
565.143	27.6374
567.072	27.4842
569.001	27.5317
570.93	27.8863
572.858	28.4261
574.787	28.508
576.716	28.3549
578.645	28.3482
580.574	28.2591
582.502	28.3811
584.431	28.4781
586.36	28.6694
588.289	28.7182
590.218	28.6675
592.147	28.6715
594.075	28.8851
596.004	28.907
597.933	28.9419
599.862	28.9947
601.791	29.122
603.719	29.2477
605.648	29.2653
607.577	29.2771
609.506	29.3926
611.435	29.4798
613.363	29.5302
615.292	29.4225
617.221	29.3166
619.15	29.4442
621.079	29.6967
623.008	29.8383
624.936	29.8305
626.865	29.9197
628.794	29.9265
630.723	29.7047
632.652	29.6111
634.58	29.5469
636.509	29.5692
638.438	29.6335
640.367	29.7968
642.296	29.9977
644.225	30.0377
646.153	30.0722
648.082	30.0943
650.011	30.1369
651.94	30.2117
653.869	30.3821
655.797	30.4657
657.726	30.5101
659.655	30.5738
661.584	30.6699
663.513	30.7939
665.442	30.6438
667.37	29.9226
669.299	29.7397
671.228	30.4917
673.157	30.7631
675.086	30.7838
677.014	30.7906
678.943	30.8053
680.872	30.891
682.801	30.9528
684.73	30.9309
686.658	30.8775
688.587	30.9534
690.516	31.0725
692.445	31.1021
694.374	31.1812
696.303	31.3734
698.231	31.4387
700.16	31.5543
702.089	31.732
704.018	31.7097
705.947	31.7532
707.875	31.8297
709.804	31.8748
711.733	31.8566
713.662	31.9324
715.591	32.0903
717.52	32.1044
719.448	32.0998
721.377	32.156
723.306	32.3171
725.235	32.3435
727.164	32.3481
729.092	32.2976
731.021	32.3154
732.95	32.3831
734.879	32.4687
736.808	32.577
738.737	32.6343
740.665	32.6209
742.594	32.6467
744.523	32.6752
746.452	32.6908
748.381	32.6948
750.309	32.7262
752.238	32.7025
754.167	32.6923
756.096	32.6958
758.025	32.7639
759.954	32.7724
761.882	32.7984
763.811	32.8132
765.74	32.8629
767.669	32.8832
769.598	32.9211
771.526	32.8876
773.455	32.8955
775.384	32.9807
777.313	32.9605
779.242	32.9375
781.17	33.0411
783.099	33.1621
785.028	33.1309
786.957	33.1069
788.886	33.1513
790.815	33.2216
792.743	33.3282
794.672	33.3594
796.601	33.3461
798.53	33.3737
800.459	33.4461
802.387	33.475
804.316	33.5467
806.245	33.5956
808.174	33.6033
810.103	33.5657
812.032	33.6152
813.96	33.7041
815.889	33.7177
817.818	33.6828
819.747	33.5794
821.676	33.5729
823.604	33.5773
825.533	33.5581
827.462	33.5911
829.391	33.6293
831.32	33.6425
833.249	33.6525
835.177	33.6768
837.106	33.7396
839.035	33.8162
840.964	33.8261
842.893	33.8935
844.821	33.93
846.75	33.8909
848.679	33.9216
850.608	33.9766
852.537	33.985
854.465	34.0402
856.394	34.0522
858.323	34.008
860.252	33.989
862.181	33.9747
864.11	34.0022
866.038	34.0488
867.967	34.08
869.896	34.0095
871.825	33.9995
873.754	34.0368
875.682	34.0106
877.611	34.0167
879.54	34.0035
881.469	34.0017
883.398	33.9341
885.327	33.9225
887.255	33.8984
889.184	33.9016
891.113	33.9015
893.042	33.943
894.971	33.9714
896.899	33.941
898.828	33.961
900.757	34.003
902.686	34.0417
904.615	34.0089
906.544	33.9892
908.472	33.9633
910.401	33.9771
912.33	33.9929
914.259	33.9836
916.188	34.0325
918.116	34.0418
920.045	34.098
921.974	34.1362
923.903	34.1187
925.832	34.075
927.76	34.0882
929.689	34.1157
931.618	34.1464
933.547	34.1743
935.476	34.1952
937.405	34.2119
939.333	34.1741
941.262	34.1881
943.191	34.2053
945.12	34.212
947.049	34.2183
948.977	34.2629
950.906	34.2901
952.835	34.2828
954.764	34.303
956.693	34.3254
958.622	34.3774
960.55	34.3757
962.479	34.4066
964.408	34.4435
966.337	34.4778
968.266	34.5237
970.194	34.5341
972.123	34.5595
974.052	34.5909
975.981	34.6135
977.91	34.6265
979.839	34.6951
981.767	34.7076
983.696	34.686
985.625	34.6937
987.554	34.7514
989.483	34.7824
991.411	34.7523
993.34	34.7732
995.269	34.7767
997.198	34.7691
999.127	34.736
1001.06	34.7357
1002.98	34.7597
1004.91	34.7898
1006.84	34.7879
1008.77	34.8046
1010.7	34.8794
1012.63	34.9572
1014.56	35.0267
1016.49	35.0508
1018.41	35.1136
1020.34	35.1739
1022.27	35.201
1024.2	35.1953
1026.13	35.1875
1028.06	35.2096
1029.99	35.1746
1031.92	35.1557
1033.85	35.2361
1035.77	35.4417
1037.7	35.5063
1039.63	35.5333
1041.56	35.5601
1043.49	35.5789
1045.42	35.6028
1047.35	35.6373
1049.28	35.6769
1051.2	35.7119
1053.13	35.7926
1055.06	35.827
1056.99	35.9032
1058.92	36.0227
1060.85	36.1201
1062.78	36.2166
1064.71	36.2972
1066.64	36.409
1068.56	36.5014
1070.49	36.5996
1072.42	36.6915
1074.35	36.8679
1076.28	37.0158
1078.21	37.1533
1080.14	37.31
1082.07	37.4599
1083.99	37.605
1085.92	37.6846
1087.85	37.7697
1089.78	37.8614
1091.71	37.9248
1093.64	37.9781
1095.57	38.0388
1097.5	38.0839
1099.43	38.12
1101.35	38.1395
1103.28	38.1958
1105.21	38.3127
1107.14	38.4348
1109.07	38.5651
1111	38.6537
1112.93	38.745
1114.86	38.8228
1116.78	38.9081
1118.71	38.9809
1120.64	39.0753
1122.57	39.1415
1124.5	39.2003
1126.43	39.2698
1128.36	39.2847
1130.29	39.2922
1132.21	39.3135
1134.14	39.3247
1136.07	39.3436
1138	39.4113
1139.93	39.4459
1141.86	39.4396
1143.79	39.4883
1145.72	39.5067
1147.65	39.5327
1149.57	39.544
1151.5	39.5796
1153.43	39.655
1155.36	39.6977
1157.29	39.7041
1159.22	39.6996
1161.15	39.7219
1163.08	39.7596
1165	39.8019
1166.93	39.8197
1168.86	39.8381
1170.79	39.8381
1172.72	39.8235
1174.65	39.8271
1176.58	39.8705
1178.51	39.8986
1180.44	39.8996
1182.36	39.9091
1184.29	39.8782
1186.22	39.8486
1188.15	39.8185
1190.08	39.8176
1192.01	39.794
1193.94	39.7744
1195.87	39.7409
1197.79	39.7436
1199.72	39.7706
1201.65	39.7543
1203.58	39.7322
1205.51	39.746
1207.44	39.7721
1209.37	39.7787
1211.3	39.7452
1213.23	39.739
1215.15	39.7742
1217.08	39.7939
1219.01	39.7916
1220.94	39.8162
1222.87	39.7994
1224.8	39.7806
1226.73	39.8128
1228.66	39.8403
1230.58	39.7992
1232.51	39.7813
1234.44	39.7983
1236.37	39.7916
1238.3	39.7838
1240.23	39.7926
1242.16	39.8117
1244.09	39.7918
1246.02	39.8233
1247.94	39.8461
1249.87	39.8442
1251.8	39.8313
1253.73	39.8407
1255.66	39.8822
1257.59	39.8787
1259.52	39.8568
1261.45	39.91
1263.37	40.0059
1265.3	39.9903
1267.23	39.962
1269.16	39.9199
1271.09	39.9328
1273.02	40.049
1274.95	40.1334
1276.88	40.1368
1278.81	40.1103
1280.73	40.0943
1282.66	40.113
1284.59	40.0871
1286.52	39.9694
1288.45	39.9059
1290.38	40.0149
1292.31	40.0803
1294.24	40.1046
1296.16	40.0516
1298.09	40.0989
1300.02	40.0934
1301.95	40.0693
1303.88	40.0431
1305.81	40.0124
1307.74	39.9532
1309.67	39.9487
1311.59	39.7603
1313.52	39.5989
1315.45	39.6457
1317.38	39.5352
1319.31	39.5581
1321.24	39.9027
1323.17	40.1161
1325.1	40.1965
1327.03	40.2273
1328.95	40.247
1330.88	40.2925
1332.81	40.3657
1334.74	40.2307
1336.67	39.7326
1338.6	39.004
1340.53	39.3327
1342.46	40.1999
1344.38	40.3925
1346.31	40.4297
1348.24	40.4963
1350.17	40.5981
1352.1	40.6552
1354.03	40.5012
1355.96	40.4513
1357.89	40.4215
1359.82	40.0805
1361.74	39.4419
1363.67	39.7677
1365.6	40.3626
1367.53	40.2461
1369.46	40.2207
1371.39	40.1951
1373.32	39.6391
1375.25	39.8445
1377.17	40.3417
1379.1	40.4537
1381.03	40.6597
1382.96	40.7881
1384.89	40.5407
1386.82	39.9917
1388.75	40.4163
1390.68	40.7653
1392.61	40.4409
1394.53	39.7269
1396.46	39.7395
1398.39	39.9248
1400.32	40.6309
1402.25	40.9675
1404.18	40.6236
1406.11	40.8572
1408.04	41.1535
1409.96	41.0173
1411.89	41.0139
1413.82	41.1474
1415.75	40.6242
1417.68	39.6563
1419.61	39.992
1421.54	40.7742
1423.47	40.6193
1425.4	40.9923
1427.32	41.0754
1429.25	40.7448
1431.18	40.8212
1433.11	40.7865
1435.04	40.2638
1436.97	40.3209
1438.9	41.2531
1440.83	41.5411
1442.75	41.6245
1444.68	41.5021
1446.61	41.0677
1448.54	41.137
1450.47	41.4321
1452.4	41.1845
1454.33	40.4299
1456.26	38.8259
1458.18	39.4837
1460.11	41.3186
1462.04	41.786
1463.97	41.3733
1465.9	41.6243
1467.83	42.037
1469.76	41.6469
1471.69	40.223
1473.62	39.9524
1475.54	40.8977
1477.47	41.7503
1479.4	41.9406
1481.33	41.7366
1483.26	41.8835
1485.19	41.4563
1487.12	40.3881
1489.05	39.3529
1490.97	40.3282
1492.9	41.3388
1494.83	40.8936
1496.76	40.1488
1498.69	40.4355
1500.62	40.8718
1502.55	40.8486
1504.48	40.0147
1506.41	37.4188
1508.33	37.8673
1510.26	39.5113
1512.19	40.3871
1514.12	40.3665
1516.05	39.4183
1517.98	39.6079
1519.91	39.3274
1521.84	38.7915
1523.76	39.829
1525.69	40.0137
1527.62	40.7125
1529.55	41.4381
1531.48	41.0978
1533.41	40.4169
1535.34	41.0962
1537.27	40.7205
1539.2	38.9912
1541.12	38.1595
1543.05	39.1599
1544.98	40.2231
1546.91	41.4948
1548.84	41.2042
1550.77	41.0313
1552.7	40.981
1554.63	40.2684
1556.55	39.5605
1558.48	38.1343
1560.41	40.7019
1562.34	41.4412
1564.27	41.3915
1566.2	41.483
1568.13	41.0872
1570.06	41.092
1571.99	41.8416
1573.91	41.4955
1575.84	40.7912
1577.77	41.5869
1579.7	42.2835
1581.63	42.503
1583.56	42.5726
1585.49	42.6351
1587.42	42.6304
1589.34	42.5293
1591.27	42.5044
1593.2	42.4478
1595.13	42.3944
1597.06	42.6507
1598.99	42.8118
1600.92	42.6696
1602.85	42.6039
1604.77	42.7719
1606.7	42.6582
1608.63	42.6043
1610.56	42.9302
1612.49	43.1479
1614.42	42.7051
1616.35	42.1505
1618.28	42.9914
1620.21	43.2543
1622.13	42.696
1624.06	42.9379
1625.99	43.4967
1627.92	43.6067
1629.85	44.1244
1631.78	44.1421
1633.71	43.473
1635.64	42.4783
1637.56	43.4403
1639.49	44.2709
1641.42	44.5573
1643.35	44.3311
1645.28	43.2561
1647.21	42.3176
1649.14	43.6204
1651.07	43.4493
1653	42.4491
1654.92	44.2286
1656.85	45.1091
1658.78	45.4565
1660.71	45.1268
1662.64	44.8351
1664.57	45.6056
1666.5	45.4714
1668.43	44.4185
1670.35	44.2736
1672.28	45.0447
1674.21	44.9999
1676.14	45.4311
1678.07	45.6119
1680	44.8633
1681.93	44.0896
1683.86	43.211
1685.79	44.8506
1687.71	45.1689
1689.64	45.4165
1691.57	46.0151
1693.5	45.7
1695.43	44.47
1697.36	43.8373
1699.29	43.7602
1701.22	44.8942
1703.14	45.1535
1705.07	44.8617
1707	45.566
1708.93	46.1565
1710.86	46.2166
1712.79	45.7519
1714.72	44.4476
1716.65	43.6165
1718.58	45.1118
1720.5	46.5231
1722.43	46.6145
1724.36	46.8293
1726.29	47.0922
1728.22	46.6967
1730.15	45.8475
1732.08	45.1298
1734.01	44.7044
1735.93	46.2618
1737.86	46.2956
1739.79	46.1433
1741.72	46.2739
1743.65	45.8969
1745.58	45.7325
1747.51	45.1883
1749.44	44.9806
1751.36	45.8422
1753.29	46.9211
1755.22	46.9224
1757.15	46.6142
1759.08	46.7548
1761.01	46.4638
1762.94	46.7953
1764.87	47.2139
1766.8	46.8163
1768.72	46.339
1770.65	45.681
1772.58	45.4134
1774.51	46.3143
1776.44	46.687
1778.37	46.636
1780.3	46.2933
1782.23	46.5915
1784.15	46.588
1786.08	46.7613
1788.01	46.779
1789.94	46.0321
1791.87	45.2656
1793.8	45.816
1795.73	46.0054
1797.66	46.1398
1799.59	45.9699
1801.51	45.9127
1803.44	46.4701
1805.37	46.7544
1807.3	46.572
1809.23	46.3201
1811.16	46.1649
1813.09	46.5682
1815.02	46.8179
1816.94	46.7044
1818.87	46.7222
1820.8	46.7129
1822.73	46.3481
1824.66	45.9862
1826.59	46.096
1828.52	45.7143
1830.45	45.6763
1832.38	46.3703
1834.3	46.4823
1836.23	46.3901
1838.16	46.4078
1840.09	46.4809
1842.02	45.8488
1843.95	45.2484
1845.88	45.6119
1847.81	46.072
1849.73	46.526
1851.66	46.7635
1853.59	46.7674
1855.52	46.8245
1857.45	46.6922
1859.38	46.5914
1861.31	46.6522
1863.24	46.7152
1865.17	46.2676
1867.09	45.4311
1869.02	45.2303
1870.95	46.1769
1872.88	46.6679
1874.81	46.8116
1876.74	46.8055
1878.67	46.8159
1880.6	46.8096
1882.52	46.8144
1884.45	46.7012
1886.38	46.6098
1888.31	46.2903
1890.24	46.405
1892.17	46.6738
1894.1	46.4982
1896.03	46.5919
1897.95	46.8278
1899.88	46.802
1901.81	46.8651
1903.74	46.8168
1905.67	46.7221
1907.6	46.5115
1909.53	46.4608
1911.46	46.6834
1913.39	46.84
1915.31	46.7099
1917.24	46.4325
1919.17	46.5013
1921.1	46.4295
1923.03	46.2716
1924.96	46.7767
1926.89	46.9261
1928.82	46.9867
1930.74	47.0008
1932.67	47.0594
1934.6	47.0395
1936.53	47.1957
1938.46	47.1389
1940.39	46.8042
1942.32	46.379
1944.25	46.8625
1946.18	47.0031
1948.1	47.1676
1950.03	47.3316
1951.96	47.4296
1953.89	47.3486
1955.82	47.508
1957.75	47.5346
1959.68	47.7222
1961.61	47.6841
1963.53	47.2928
1965.46	47.0746
1967.39	47.2833
1969.32	47.5058
1971.25	47.5648
1973.18	47.5609
1975.11	47.8727
1977.04	47.8516
1978.97	48.0494
1980.89	47.7974
1982.82	47.7303
1984.75	47.4094
1986.68	47.2887
1988.61	47.1318
1990.54	47.0782
1992.47	47.1855
1994.4	47.6408
1996.32	47.8142
1998.25	47.8561
2000.18	48.0179
2002.11	48.0316
2004.04	47.9274
2005.97	47.8868
2007.9	47.8277
2009.83	48.5357
2011.76	48.6188
2013.68	48.3271
2015.61	47.8136
2017.54	48.1823
2019.47	48.5569
2021.4	48.5546
2023.33	48.1326
2025.26	48.4501
2027.19	48.5962
2029.11	48.4068
2031.04	48.0872
2032.97	48.3249
2034.9	48.3494
2036.83	48.0823
2038.76	47.9247
2040.69	47.913
2042.62	47.7454
2044.54	47.8593
2046.47	48.2031
2048.4	48.3234
2050.33	47.8747
2052.26	47.5968
2054.19	47.3792
2056.12	47.5416
2058.05	47.6045
2059.98	47.6749
2061.9	47.6403
2063.83	47.4709
2065.76	47.3774
2067.69	47.4856
2069.62	47.4577
2071.55	47.5398
2073.48	47.5335
2075.41	47.5592
2077.33	47.572
2079.26	47.6329
2081.19	47.4865
2083.12	47.3739
2085.05	47.2647
2086.98	47.1684
2088.91	47.1812
2090.84	47.3705
2092.77	47.4519
2094.69	47.4389
2096.62	47.3469
2098.55	47.2614
2100.48	47.2084
2102.41	47.2662
2104.34	47.2959
2106.27	47.3284
2108.2	47.3222
2110.12	47.3758
2112.05	47.396
2113.98	47.4135
2115.91	47.3829
2117.84	47.3599
2119.77	47.4367
2121.7	47.4909
2123.63	47.4882
2125.56	47.5356
2127.48	47.7393
2129.41	47.903
2131.34	47.847
2133.27	47.8716
2135.2	47.8793
2137.13	47.9339
2139.06	48.0635
2140.99	48.1246
2142.91	48.1208
2144.84	48.2023
2146.77	48.1232
2148.7	48.1759
2150.63	48.1995
2152.56	48.357
2154.49	48.5879
2156.42	49.1635
2158.35	48.9698
2160.27	48.743
2162.2	48.8642
2164.13	49.0451
2166.06	48.8191
2167.99	48.5429
2169.92	48.454
2171.85	48.5036
2173.78	48.2614
2175.7	48.24
2177.63	48.2612
2179.56	48.439
2181.49	48.7167
2183.42	48.7996
2185.35	48.5347
2187.28	48.5557
2189.21	48.4353
2191.13	48.0966
2193.06	48.0768
2194.99	48.285
2196.92	48.2484
2198.85	48.38
2200.78	48.4318
2202.71	48.1746
2204.64	47.9428
2206.57	48.1234
2208.49	48.1472
2210.42	48.152
2212.35	48.1198
2214.28	48.1454
2216.21	47.9659
2218.14	47.8325
2220.07	48.0266
2222	48.1255
2223.92	47.9018
2225.85	47.884
2227.78	47.9263
2229.71	47.931
2231.64	47.7869
2233.57	47.8714
2235.5	47.9767
2237.43	47.8571
2239.36	47.7023
2241.28	47.7815
2243.21	47.8629
2245.14	47.8189
2247.07	47.7938
2249	47.8347
2250.93	47.8355
2252.86	47.947
2254.79	47.8669
2256.71	47.7214
2258.64	47.5824
2260.57	47.5146
2262.5	47.5365
2264.43	47.5638
2266.36	47.5201
2268.29	47.5388
2270.22	47.546
2272.15	47.5645
2274.07	47.5457
2276	47.5826
2277.93	47.5072
2279.86	47.502
2281.79	47.5348
2283.72	47.5055
2285.65	47.3957
2287.58	47.2666
2289.5	47.115
2291.43	46.9877
2293.36	46.8245
2295.29	46.7068
2297.22	46.5726
2299.15	46.4793
2301.08	46.2917
2303.01	46.0576
2304.94	45.8403
2306.86	45.624
2308.79	45.3225
2310.72	45.0741
2312.65	44.9955
2314.58	44.923
2316.51	44.7183
2318.44	44.4513
2320.37	44.1483
2322.29	43.8909
2324.22	43.7586
2326.15	43.6919
2328.08	43.488
2330.01	43.4075
2331.94	43.4457
2333.87	43.5909
2335.8	43.5649
2337.72	43.4721
2339.65	43.3216
2341.58	43.2169
2343.51	43.4162
2345.44	43.9329
2347.37	44.4307
2349.3	44.1889
2351.23	43.5336
2353.16	42.9919
2355.08	42.3841
2357.01	41.8334
2358.94	41.723
2360.87	41.983
2362.8	42.0763
2364.73	42.2392
2366.66	42.5421
2368.59	42.9928
2370.51	43.6791
2372.44	44.2776
2374.37	44.7757
2376.3	45.3256
2378.23	45.8268
2380.16	46.3149
2382.09	46.7349
2384.02	47.0993
2385.95	47.3797
2387.87	47.5946
2389.8	47.6823
2391.73	47.7288
2393.66	47.7558
2395.59	47.7195
2397.52	47.6914
2399.45	47.7889
2401.38	47.8144
2403.3	47.8108
2405.23	47.7991
2407.16	47.805
2409.09	47.8327
2411.02	47.8949
2412.95	47.9162
2414.88	47.9147
2416.81	47.9348
2418.74	47.897
2420.66	47.8824
2422.59	47.9214
2424.52	47.9048
2426.45	47.8504
2428.38	47.8473
2430.31	47.8833
2432.24	47.8658
2434.17	47.8471
2436.09	47.8292
2438.02	47.7989
2439.95	47.822
2441.88	47.8373
2443.81	47.8298
2445.74	47.8385
2447.67	47.8188
2449.6	47.7663
2451.53	47.752
2453.45	47.8124
2455.38	47.8364
2457.31	47.8349
2459.24	47.8793
2461.17	47.9087
2463.1	47.8984
2465.03	47.8745
2466.96	47.8641
2468.88	47.8689
2470.81	47.8865
2472.74	47.9287
2474.67	47.9603
2476.6	47.9679
2478.53	47.9599
2480.46	47.9349
2482.39	47.8848
2484.32	47.8971
2486.24	47.967
2488.17	47.9926
2490.1	47.9133
2492.03	47.9218
2493.96	47.9268
2495.89	47.911
2497.82	47.9021
2499.75	47.903
2501.67	47.8951
2503.6	47.9217
2505.53	47.8738
2507.46	47.8131
2509.39	47.8295
2511.32	47.849
2513.25	47.8403
2515.18	47.8555
2517.1	47.8569
2519.03	47.8716
2520.96	47.9409
2522.89	47.9775
2524.82	47.9301
2526.75	47.9274
2528.68	47.964
2530.61	47.9992
2532.54	47.9862
2534.46	47.9667
2536.39	47.95
2538.32	47.9779
2540.25	47.987
2542.18	47.9633
2544.11	47.9806
2546.04	48.0436
2547.97	48.0168
2549.89	47.9869
2551.82	48.0087
2553.75	48.0556
2555.68	48.035
2557.61	48.0026
2559.54	47.9604
2561.47	47.9521
2563.4	47.9263
2565.33	47.9592
2567.25	47.9487
2569.18	47.9149
2571.11	47.9199
2573.04	47.8947
2574.97	47.8728
2576.9	47.9004
2578.83	47.8943
2580.76	47.883
2582.68	47.9079
2584.61	47.9372
2586.54	47.9328
2588.47	47.915
2590.4	47.9313
2592.33	47.9449
2594.26	47.9657
2596.19	48.0116
2598.12	47.987
2600.04	48.0352
2601.97	48.0713
2603.9	48.0757
2605.83	48.0376
2607.76	48.0142
2609.69	48.0553
2611.62	48.0861
2613.55	48.0464
2615.47	48.0165
2617.4	48.022
2619.33	48.0329
2621.26	48.0189
2623.19	48.0339
2625.12	48.0714
2627.05	48.0689
2628.98	48.0193
2630.91	48.0071
2632.83	47.9957
2634.76	47.9951
2636.69	47.9909
2638.62	48.0205
2640.55	48.007
2642.48	47.988
2644.41	47.9978
2646.34	48.0195
2648.26	48.0505
2650.19	48.0697
2652.12	48.0513
2654.05	48.0488
2655.98	48.0487
2657.91	48.0615
2659.84	48.0755
2661.77	48.0948
2663.69	48.0878
2665.62	48.1012
2667.55	48.128
2669.48	48.1192
2671.41	48.108
2673.34	48.1097
2675.27	48.1183
2677.2	48.1584
2679.13	48.1665
2681.05	48.1618
2682.98	48.1432
2684.91	48.1194
2686.84	48.1077
2688.77	48.1042
2690.7	48.1062
2692.63	48.1077
2694.56	48.1074
2696.48	48.1173
2698.41	48.1264
2700.34	48.1368
2702.27	48.1237
2704.2	48.113
2706.13	48.1213
2708.06	48.1306
2709.99	48.129
2711.92	48.1253
2713.84	48.1133
2715.77	48.1233
2717.7	48.1159
2719.63	48.1047
2721.56	48.1261
2723.49	48.1459
2725.42	48.1745
2727.35	48.168
2729.27	48.1617
2731.2	48.1828
2733.13	48.1926
2735.06	48.2035
2736.99	48.193
2738.92	48.21
2740.85	48.2069
2742.78	48.2093
2744.71	48.2373
2746.63	48.242
2748.56	48.2279
2750.49	48.2219
2752.42	48.208
2754.35	48.2275
2756.28	48.2221
2758.21	48.2174
2760.14	48.2256
2762.06	48.2122
2763.99	48.1981
2765.92	48.2244
2767.85	48.2225
2769.78	48.2202
2771.71	48.2203
2773.64	48.2205
2775.57	48.2009
2777.5	48.1668
2779.42	48.1592
2781.35	48.207
2783.28	48.2006
2785.21	48.1991
2787.14	48.2219
2789.07	48.2444
2791	48.216
2792.93	48.2109
2794.85	48.2072
2796.78	48.2115
2798.71	48.2109
2800.64	48.227
2802.57	48.2523
2804.5	48.2312
2806.43	48.1833
2808.36	48.1843
2810.28	48.2004
2812.21	48.2156
2814.14	48.201
2816.07	48.1995
2818	48.1923
2819.93	48.1968
2821.86	48.1889
2823.79	48.2
2825.72	48.2084
2827.64	48.1826
2829.57	48.1452
2831.5	48.1405
2833.43	48.1657
2835.36	48.1914
2837.29	48.1992
2839.22	48.211
2841.15	48.2329
2843.07	48.2418
2845	48.2436
2846.93	48.2993
2848.86	48.3967
2850.79	48.4336
2852.72	48.4123
2854.65	48.4172
2856.58	48.3975
2858.51	48.3705
2860.43	48.3297
2862.36	48.2989
2864.29	48.2776
2866.22	48.2625
2868.15	48.2937
2870.08	48.3241
2872.01	48.3178
2873.94	48.3215
2875.86	48.3315
2877.79	48.3535
2879.72	48.3468
2881.65	48.3328
2883.58	48.3244
2885.51	48.3251
2887.44	48.353
2889.37	48.3721
2891.3	48.4033
2893.22	48.4081
2895.15	48.3537
2897.08	48.3737
2899.01	48.4085
2900.94	48.4062
2902.87	48.4077
2904.8	48.4195
2906.73	48.4334
2908.65	48.4585
2910.58	48.4866
2912.51	48.5507
2914.44	48.5973
2916.37	48.6684
2918.3	48.7158
2920.23	48.7033
2922.16	48.6913
2924.09	48.6843
2926.01	48.6694
2927.94	48.6699
2929.87	48.666
2931.8	48.6532
2933.73	48.6366
2935.66	48.6377
2937.59	48.6419
2939.52	48.6671
2941.44	48.6935
2943.37	48.6854
2945.3	48.6822
2947.23	48.7043
2949.16	48.7224
2951.09	48.717
2953.02	48.7019
2954.95	48.6912
2956.87	48.6937
2958.8	48.7018
2960.73	48.6821
2962.66	48.6568
2964.59	48.6712
2966.52	48.6783
2968.45	48.6824
2970.38	48.672
2972.31	48.6241
2974.23	48.586
2976.16	48.5958
2978.09	48.597
2980.02	48.5524
2981.95	48.5386
2983.88	48.5455
2985.81	48.5583
2987.74	48.5139
2989.66	48.5141
2991.59	48.5205
2993.52	48.4898
2995.45	48.4743
2997.38	48.4864
2999.31	48.5283
3001.24	48.5354
3003.17	48.4809
3005.1	48.4861
3007.02	48.5074
3008.95	48.4991
3010.88	48.4494
3012.81	48.4453
3014.74	48.4797
3016.67	48.5081
3018.6	48.5305
3020.53	48.4855
3022.45	48.4455
3024.38	48.429
3026.31	48.4324
3028.24	48.3893
3030.17	48.2994
3032.1	48.2802
3034.03	48.3722
3035.96	48.4693
3037.89	48.5079
3039.81	48.4825
3041.74	48.4288
3043.67	48.4024
3045.6	48.3976
3047.53	48.3368
3049.46	48.3088
3051.39	48.3583
3053.32	48.3177
3055.24	48.2295
3057.17	48.2659
3059.1	48.3582
3061.03	48.3596
3062.96	48.3029
3064.89	48.2313
3066.82	48.3015
3068.75	48.4093
3070.68	48.4572
3072.6	48.4541
3074.53	48.4623
3076.46	48.4499
3078.39	48.375
3080.32	48.3361
3082.25	48.3872
3084.18	48.4169
3086.11	48.4168
3088.03	48.4001
3089.96	48.4068
3091.89	48.3965
3093.82	48.3339
3095.75	48.3017
3097.68	48.3436
3099.61	48.3245
3101.54	48.3036
3103.46	48.3324
3105.39	48.3766
3107.32	48.3798
3109.25	48.3492
3111.18	48.3244
3113.11	48.337
3115.04	48.3091
3116.97	48.2343
3118.9	48.2075
3120.82	48.2286
3122.75	48.2792
3124.68	48.3557
3126.61	48.3935
3128.54	48.4588
3130.47	48.4324
3132.4	48.3782
3134.33	48.4235
3136.25	48.4447
3138.18	48.4278
3140.11	48.4791
3142.04	48.4384
3143.97	48.4256
3145.9	48.4462
3147.83	48.4819
3149.76	48.5103
3151.69	48.4972
3153.61	48.4989
3155.54	48.5302
3157.47	48.5114
3159.4	48.5097
3161.33	48.5746
3163.26	48.5789
3165.19	48.4845
3167.12	48.4716
3169.04	48.5064
3170.97	48.5526
3172.9	48.5669
3174.83	48.5376
3176.76	48.5445
3178.69	48.5877
3180.62	48.6332
3182.55	48.6553
3184.48	48.5997
3186.4	48.6299
3188.33	48.6865
3190.26	48.6894
3192.19	48.6908
3194.12	48.66
3196.05	48.5796
3197.98	48.5944
3199.91	48.692
3201.83	48.8106
3203.76	48.8506
3205.69	48.8527
3207.62	48.8134
3209.55	48.8343
3211.48	48.8805
3213.41	48.7526
3215.34	48.7001
3217.27	48.7995
3219.19	48.8179
3221.12	48.8674
3223.05	48.9073
3224.98	48.8263
3226.91	48.8284
3228.84	48.8886
3230.77	48.8972
3232.7	48.9562
3234.62	49.0288
3236.55	49.0253
3238.48	48.9706
3240.41	48.9786
3242.34	49.0581
3244.27	49.0259
3246.2	49.0967
3248.13	49.2031
3250.05	49.1638
3251.98	49.129
3253.91	49.1563
3255.84	49.1826
3257.77	49.1933
3259.7	49.282
3261.63	49.355
3263.56	49.3339
3265.49	49.3559
3267.41	49.3746
3269.34	49.3816
3271.27	49.3796
3273.2	49.3242
3275.13	49.3589
3277.06	49.4305
3278.99	49.4752
3280.92	49.5037
3282.84	49.4842
3284.77	49.4926
3286.7	49.5991
3288.63	49.6119
3290.56	49.6307
3292.49	49.6498
3294.42	49.6734
3296.35	49.6852
3298.28	49.7233
3300.2	49.7389
3302.13	49.7745
3304.06	49.7788
3305.99	49.7465
3307.92	49.679
3309.85	49.6721
3311.78	49.7173
3313.71	49.7728
3315.63	49.791
3317.56	49.8255
3319.49	49.872
3321.42	49.8614
3323.35	49.8241
3325.28	49.7892
3327.21	49.765
3329.14	49.8902
3331.07	50.0011
3332.99	49.9801
3334.92	49.9191
3336.85	49.9501
3338.78	50.0266
3340.71	50.0248
3342.64	50.0587
3344.57	50.1736
3346.5	50.1391
3348.42	50.1858
3350.35	50.2504
3352.28	50.2234
3354.21	50.2021
3356.14	50.2563
3358.07	50.3105
3360	50.2379
3361.93	50.2108
3363.86	50.3047
3365.78	50.3148
3367.71	50.3397
3369.64	50.3868
3371.57	50.5543
3373.5	50.6052
3375.43	50.5542
3377.36	50.5541
3379.29	50.5805
3381.21	50.5919
3383.14	50.5745
3385.07	50.5649
3387	50.6361
3388.93	50.6504
3390.86	50.5799
3392.79	50.4771
3394.72	50.558
3396.64	50.6227
3398.57	50.8236
3400.5	50.8958
3402.43	50.8234
3404.36	50.8415
3406.29	50.9481
3408.22	51.0163
3410.15	51.0985
3412.08	51.0787
3414	51.1058
3415.93	51.2116
3417.86	51.0619
3419.79	50.7819
3421.72	50.8752
3423.65	51.0795
3425.58	51.2176
3427.51	51.2476
3429.43	51.3322
3431.36	51.3746
3433.29	51.3811
3435.22	51.3294
3437.15	51.3044
3439.08	51.3138
3441.01	51.2423
3442.94	51.2735
3444.87	51.2403
3446.79	51
3448.72	51.2878
3450.65	51.5275
3452.58	51.6775
3454.51	51.7288
3456.44	51.7302
3458.37	51.786
3460.3	51.7039
3462.22	51.5488
3464.15	51.6843
3466.08	51.7257
3468.01	51.7604
3469.94	51.9103
3471.87	51.965
3473.8	51.913
3475.73	51.9623
3477.66	51.9857
3479.58	51.7688
3481.51	51.5588
3483.44	51.7204
3485.37	51.927
3487.3	51.9522
3489.23	51.9836
3491.16	52.1314
3493.09	52.2544
3495.01	52.1009
3496.94	52.0547
3498.87	52.1154
3500.8	51.7241
3502.73	51.3542
3504.66	51.7294
3506.59	52.1677
3508.52	51.9936
3510.45	51.9446
3512.37	52.2892
3514.3	52.5187
3516.23	52.4839
3518.16	52.3868
3520.09	52.3221
3522.02	51.8246
3523.95	51.4395
3525.88	51.5935
3527.8	51.6072
3529.73	51.9753
3531.66	52.4267
3533.59	52.5924
3535.52	52.2986
3537.45	52.3884
3539.38	52.6952
3541.31	52.5697
3543.23	51.9013
3545.16	51.2194
3547.09	51.505
3549.02	52.2333
3550.95	52.1738
3552.88	52.1431
3554.81	52.5934
3556.74	52.748
3558.67	52.5281
3560.59	52.1341
3562.52	51.9424
3564.45	51.1316
3566.38	49.7182
3568.31	50.7865
3570.24	52.3418
3572.17	52.7867
3574.1	52.693
3576.02	52.529
3577.95	52.5792
3579.88	52.6203
3581.81	52.6671
3583.74	52.2971
3585.67	51.1444
3587.6	50.4103
3589.53	51.897
3591.46	52.3499
3593.38	51.7789
3595.31	51.5739
3597.24	51.9345
3599.17	51.9184
3601.1	52.066
3603.03	52.578
3604.96	52.467
3606.89	51.5296
3608.81	51.292
3610.74	51.6883
3612.67	51.1535
3614.6	51.0975
3616.53	51.2849
3618.46	50.8369
3620.39	51.4867
3622.32	52.5002
3624.25	52.5375
3626.17	51.6179
3628.1	50.2329
3630.03	51.0865
3631.96	52.1675
3633.89	52.4957
3635.82	53.0038
3637.75	53.0891
3639.68	53.0719
3641.6	52.8276
3643.53	52.6484
3645.46	51.7395
3647.39	49.5724
3649.32	48.8025
3651.25	51.2545
3653.18	52.6854
3655.11	52.4173
3657.04	52.6897
3658.96	53.3016
3660.89	53.5121
3662.82	53.5943
3664.75	53.3914
3666.68	52.7278
3668.61	51.3195
3670.54	50.9405
3672.47	51.6863
3674.39	50.5719
3676.32	50.519
3678.25	51.6823
3680.18	52.4535
3682.11	53.1293
3684.04	53.0711
3685.97	52.3909
3687.9	51.1678
3689.83	50.5059
3691.75	51.6568
3693.68	52.6788
3695.61	52.8321
3697.54	52.8427
3699.47	52.5594
3701.4	52.2332
3703.33	52.6259
3705.26	52.6959
3707.18	52.1998
3709.11	51.049
3711.04	50.0619
3712.97	51.4392
3714.9	52.501
3716.83	52.6373
3718.76	52.3025
3720.69	51.7224
3722.61	51.0348
3724.54	50.8789
3726.47	51.0418
3728.4	51.6806
3730.33	51.4026
3732.26	50.3637
3734.19	48.9747
3736.12	48.9389
3738.05	50.6283
3739.97	51.0325
3741.9	50.7239
3743.83	50.1503
3745.76	50.3673
3747.69	50.0273
3749.62	49.1192
3751.55	49.4044
3753.48	51.3719
3755.4	51.9297
3757.33	51.7536
3759.26	51.7522
3761.19	52.6293
3763.12	52.7105
3765.05	52.2045
3766.98	52.2754
3768.91	52.0844
3770.84	52.4455
3772.76	53.1435
3774.69	53.2853
3776.62	52.978
3778.55	52.2973
3780.48	52.5929
3782.41	52.8776
3784.34	52.5114
3786.27	52.6777
3788.19	53.1087
3790.12	53.264
3792.05	53.2748
3793.98	52.845
3795.91	52.0401
3797.84	51.6478
3799.77	51.0402
3801.7	50.5972
3803.63	51.8814
3805.55	51.8398
3807.48	52.0773
3809.41	52.9297
3811.34	53.0584
3813.27	52.6077
3815.2	51.5728
3817.13	51.3712
3819.06	50.8295
3820.98	50.242
3822.91	51.7302
3824.84	51.9961
3826.77	52.008
3828.7	52.3305
3830.63	52.1578
3832.56	51.9658
3834.49	51.6124
3836.42	50.757
3838.34	50.1938
3840.27	50.6058
3842.2	51.4366
3844.13	52.0717
3846.06	52.801
3847.99	52.5245
3849.92	51.4068
3851.85	49.6541
3853.77	49.5875
3855.7	51.4245
3857.63	52.1223
3859.56	52.411
3861.49	51.6966
3863.42	50.931
3865.35	51.3231
3867.28	51.7171
3869.2	50.782
3871.13	51.064
3873.06	51.4402
3874.99	52.196
3876.92	52.8218
3878.85	52.15
3880.78	51.5086
3882.71	51.6927
3884.64	51.4389
3886.56	52.2744
3888.49	52.739
3890.42	52.0211
3892.35	51.8749
3894.28	52.539
3896.21	52.5768
3898.14	51.7063
3900.07	51.0532
3901.99	50.8349
3903.92	50.8284
3905.85	51.968
3907.78	53.0821
3909.71	53.447
3911.64	53.4212
3913.57	53.2481
3915.5	52.5779
3917.43	52.2312
3919.35	52.4956
3921.28	52.6221
3923.21	52.2353
3925.14	52.2887
3927.07	52.8984
3929	52.588
3930.93	52.1249
3932.86	52.2881
3934.78	52.9814
3936.71	53.2254
3938.64	53.1302
3940.57	52.8716
3942.5	52.4977
3944.43	52.7476
3946.36	52.7948
3948.29	52.3849
3950.22	52.6014
3952.14	53.0936
3954.07	53.3298
3956	53.2856
3957.93	53.2157
3959.86	53.1162
3961.79	53.0532
3963.72	53.2447
3965.65	53.4084
3967.57	53.3417
3969.5	53.2488
3971.43	53.2089
3973.36	53.1341
3975.29	53.0994
3977.22	53.2567
3979.15	53.3933
3981.08	53.394
3983.01	53.3952
3984.93	53.4405
3986.86	53.4456
3988.79	53.3245
3990.72	53.2682
3992.65	53.3606
3994.58	53.3188
3996.51	53.4162
3998.44	53.51
4000.36	53.5079
